# Supplementary material for: On standardised moments of force distribution in simple liquids
Source: Royal Society of Chemistry journal article supplement (doi:10.1039/d1cp04056a), 2022-01-01
Supplement: d1cp04056a1.zip [file d1cp04056a1.zip]

## Sheet: Sheet1
ParticleNumber	Boxwidth	Temperature	Kurtosis	a6	a8	a10	a12
2	5	1	526.94	1092800	5097600000	43237000000000	5.9417e+17
2	6	1	877.99	3039500	23672000000	327850000000000	6.8757e+18
2	7.2	1	1500.5	8830000	114760000000	2539500000000000	8.0399e+19
2	8.64	1	2571.3	26135000	603410000000	24372000000000000	1.4149e+21
2	10.368	1	4433	78418000	3173300000000	2.2166e+17	2.1628e+22
2	12.442	1	7629.2	227490000	14812000000000	1.6014e+18	2.3974e+23
2	14.93	1	12930	664360000	78101000000000	1.644e+19	5.1012e+24
2	17.916	1	22877	2122900000	472070000000000	1.9181e+20	1.1359e+26
2	21.499	1	38971	5990000000	2105700000000000	1.331e+21	1.2503e+27
2	25.799	1	68568	17784000000	9476200000000000	7.5607e+21	7.4906e+27
2	30.959	1	111560	47045000000	39943000000000000	5.0363e+22	7.9384e+28
2	37.15	1	212680	170640000000	2.7876e+17	6.7968e+23	2.0739e+30
2	44.581	1	350170	441690000000	1.0516e+18	3.5158e+24	1.4222e+31
2	53.497	1	574550	1177400000000	4.8891e+18	3.1384e+25	2.5928e+32
2	64.196	1	1103300	5137500000000	5.1806e+19	7.8467e+26	1.465e+34
2	77.035	1	649890	2279300000000	1.5351e+19	1.4775e+26	1.7086e+33
2	92.442	1	3045000	32825000000000	6.1256e+20	1.501e+28	4.2617e+35
2	110.93	1	3358100	49879000000000	1.421e+21	5.5781e+28	2.5955e+36
2	133.12	1	7637200	169760000000000	5.9057e+21	2.5079e+29	1.1793e+37
2	159.74	1	13318000	636770000000000	6.4593e+22	9.2345e+30	1.4865e+39
2	5	0.05	8.2954	240.92	14080	1295900	168850000
2	5	0.1	11.344	496.2	43618	6232400	1300800000
2	5	0.15	16.873	1129.1	152510	34036000	11196000000
2	5	0.2	26.014	2705.9	576800	209750000	120330000000
2	5	0.25	41.009	6807.6	2359600	1427500000	1392100000000
2	5	0.3	62.478	15753	8388200	7731500000	10783000000000
2	5	0.35	88.2	31069	23069000	29588000000	58204000000000
2	5	0.4	119.68	56625	56638000	96203000000	241390000000000
2	5	0.45	150.08	89672	114170000	248940000000	810670000000000
2	5	0.5	185.9	137190	220080000	622280000000	2698100000000000
2	5	0.55	221.88	194230	373760000	1302200000000	7324000000000000
2	5	0.6	258.39	262480	582910000	2281800000000	13879000000000000
2	5	0.65	292.96	338210	861470000	3898700000000	27341000000000000
2	5	0.7	329.65	426750	1216400000	6140200000000	48714000000000000
2	5	0.75	365.66	523520	1637100000	8856400000000	72918000000000000
2	5	0.8	399.82	630360	2253200000	14771000000000	1.5363e+17
2	5	0.85	434.53	744350	2917500000	21616000000000	2.6927e+17
2	5	0.9	466.31	852650	3491700000	25497000000000	2.8314e+17
2	5	0.95	498.87	982220	4323700000	33031000000000	3.6809e+17
2	5	1	529.63	1106900	5220100000	43599000000000	5.4967e+17
2	5	1.05	558.37	1233600	6237700000	57786000000000	8.4338e+17
2	5	1.1	588.68	1376000	7399500000	71902000000000	1.0615e+18
2	5	1.15	617.1	1511800	8415500000	83000000000000	1.2267e+18
2	5	1.2	643.18	1656100	9958400000	111600000000000	1.9742e+18
2	5	1.25	668.92	1775300	10811000000	119430000000000	2.0551e+18
2	5	1.3	693.52	1912800	12221000000	142840000000000	2.5647e+18
2	5	1.35	720.37	2077000	14091000000	182500000000000	3.9186e+18
2	5	1.4	742.02	2217700	15460000000	192990000000000	3.5473e+18
2	5	1.45	767.66	2369000	17382000000	250130000000000	6.1756e+18
2	5	1.5	793.12	2556600	19707000000	285890000000000	6.4703e+18
8	3	1	22.481	1842.4	346280	122070000	72051000000
8	3.6	1	37.725	5365.6	1760400	1091600000	1141700000000
8	4.32	1	59.981	13766	7136200	6549400000	9069900000000
8	5.184	1	93.918	33715	26916000	37294000000	76051000000000
8	6.2208	1	161.14	100740	142710000	366200000000	1475800000000000
8	7.465	1	166.85	98541	118210000	231480000000	642990000000000
8	8.958	1	412.09	633840	2046200000	10703000000000	77427000000000000
8	10.75	1	803.09	2532100	18145000000	231540000000000	4.4309e+18
8	12.899	1	1018.4	3780800	29276000000	379850000000000	7.2238e+18
8	15.479	1	1856.8	12883000	189960000000	4640100000000000	1.6011e+20
8	18.575	1	4215.1	70744000	2690100000000	1.7726e+17	1.6646e+22
8	22.29	1	6312.9	151040000	8286000000000	8.6371e+17	1.4053e+23
8	26.748	1	11971	561690000	60663000000000	1.226e+19	3.8025e+24
8	32.098	1	20367	1726100000	347000000000000	1.1729e+20	5.3129e+25
8	38.518	1	31797	3871600000	1021500000000000	4.3697e+20	2.4984e+26
8	46.221	1	58736	14564000000	8332100000000000	7.7672e+21	9.4159e+27
8	55.465	1	108330	47657000000	47999000000000000	8.1317e+22	1.8792e+29
8	66.558	1	143630	83580000000	93067000000000000	1.4578e+23	2.7527e+29
8	79.87	1	295010	304920000000	6.3661e+17	2.0495e+24	8.4661e+30
8	95.844	1	320800	334960000000	6.5711e+17	1.8264e+24	6.1411e+30
8	8	0.05	4.1744	41.626	764.76	21809	873420
8	8	0.1	4.9024	63.803	1560.9	59893	3284900
8	8	0.15	5.7417	94.241	2964.9	149480	11063000
8	8	0.2	6.4065	122.5	4547.7	272660	23892000
8	8	0.25	7.7194	187.83	9093.2	732730	89965000
8	8	0.3	10.593	372.15	26549	3210700	596140000
8	8	0.35	23.538	1964.3	341500	103230000	49451000000
8	8	0.4	51.634	9981.1	4096900	2886900000	3015600000000
8	8	0.45	73.021	20171	11952000	12530000000	20825000000000
8	8	0.5	99.508	37761	30693000	42818000000	88388000000000
8	8	0.55	136.08	71603	82398000	165720000000	499050000000000
8	8	0.6	142.76	77344	90775000	185650000000	566310000000000
8	8	0.65	182.09	128170	199820000	552290000000	2332800000000000
8	8	0.7	200.54	154070	257430000	739050000000	3106600000000000
8	8	0.75	213.64	173880	307720000	951220000000	4500400000000000
8	8	0.8	246.79	234270	488410000	1759900000000	9382800000000000
8	8	0.85	255.28	248580	532350000	1976300000000	10702000000000000
8	8	0.9	283.44	308230	742850000	3194100000000	21494000000000000
8	8	0.95	291.32	322850	773300000	3104500000000	17695000000000000
8	8	1	211.34	163530	265310000	717960000000	2781900000000000
8	8	1.05	333.84	427860	1200800000	5766200000000	40768000000000000
8	8	1.1	333.72	420590	1152100000	5392200000000	36723000000000000
8	8	1.15	366.43	516600	1622600000	8994500000000	76307000000000000
8	8	1.2	375.91	539810	1699100000	9140100000000	71667000000000000
8	8	1.25	420.02	693940	2607400000	17682000000000	1.8704e+17
8	8	1.3	417.48	679060	2510200000	16775000000000	1.7456e+17
8	8	1.35	346.13	436510	1151500000	5011400000000	31325000000000000
8	8	1.4	451.46	799350	3282000000	26550000000000	4.0202e+17
8	8	1.45	443.89	760610	2890700000	18743000000000	1.7387e+17
8	8	1.5	428.62	694240	2442600000	14457000000000	1.2219e+17
64	5	1	11.184	404.3	32027	4559900	1018100000
64	6	1	16.89	980.55	127260	30298000	11538000000
64	7.2	1	24.731	2182.2	429900	152510000	84578000000
64	8.64	1	40.708	6156.8	2102600	1291400000	1213700000000
64	10.368	1	69.463	18418	11101000	12116000000	20453000000000
64	12.442	1	120.2	56143	61038000	129770000000	488510000000000
64	14.93	1	208.41	169030	312940000	1106700000000	7002000000000000
64	17.916	1	357.43	502380	1585400000	8598000000000	66215000000000000
64	21.499	1	602.85	1418400	7310700000	62570000000000	7.4104e+17
64	25.799	1	1080.9	4658600	46561000000	833840000000000	2.1872e+19
64	30.959	1	1861.3	13677000	224630000000	6287100000000000	2.4845e+20
64	37.15	1	3266.1	42354000	1255300000000	65916000000000000	5.0767e+21
64	44.581	1	5575.6	122200000	5841200000000	4.6207e+17	5.0756e+22
64	53.497	1	9572.7	376240000	34867000000000	5.6757e+18	1.2908e+24
64	64.196	1	15863	1008100000	146330000000000	3.691e+19	1.3217e+25
64	77.035	1	30002	3303400000	724240000000000	2.396e+20	1.0244e+26
64	92.442	1	49140	9748500000	4877200000000000	4.6413e+21	6.2114e+27
64	110.93	1	90868	29542000000	18320000000000000	1.6191e+22	1.752e+28
64	133.12	1	144140	73671000000	72068000000000000	1.0066e+23	1.695e+29
64	159.74	1	275250	266260000000	5.1972e+17	1.5363e+24	5.6486e+30
64	16	0.05	4.2863	39.995	618.4	13730	404260
64	16	0.1	4.3977	43.309	729.94	18314	629730
64	16	0.15	4.4973	45.425	783.72	20200	720610
64	16	0.2	4.6969	51.214	977.39	28432	1162500
64	16	0.25	4.9633	58.332	1213.8	39103	1834400
64	16	0.3	5.3924	70.863	1683.3	63124	3458200
64	16	0.35	5.7545	83.094	2215.2	95000	6057500
64	16	0.4	6.2179	100.06	3035.9	150410	11177000
64	16	0.45	6.8415	125	4396	256400	22557000
64	16	0.5	7.8276	169.13	7165.1	509890	55826000
64	16	0.55	9.7135	270.4	15072	1441200	220150000
64	16	0.6	66.307	15053	7218200	6026700000	7678700000000
64	16	0.65	118.42	53510	52790000	90671000000	231080000000000
64	16	0.7	139.59	74844	89416000	202000000000	805390000000000
64	16	0.75	157.47	95727	129490000	311830000000	1142300000000000
64	16	0.8	182.56	128810	201730000	564830000000	2510900000000000
64	16	0.85	201.99	157990	278130000	896530000000	4613700000000000
64	16	0.9	221.8	192300	379160000	1363200000000	7666700000000000
64	16	0.95	235.88	217070	453050000	1708500000000	9935000000000000
64	16	1	257.1	260680	622630000	2914000000000	23515000000000000
64	16	1.05	275.35	295880	714290000	3015300000000	18607000000000000
64	16	1.1	288.59	326540	841990000	3924300000000	28217000000000000
64	16	1.15	302.68	360590	997460000	5272000000000	46848000000000000
64	16	1.2	320.38	406450	1184400000	6200300000000	49587000000000000
64	16	1.25	334.3	439580	1315700000	6929700000000	53300000000000000
64	16	1.3	340.81	458580	1422600000	8009800000000	69289000000000000
64	16	1.35	362.69	523830	1739900000	10149000000000	86024000000000000
64	16	1.4	373.74	562130	1994000000	12975000000000	1.2878e+17
64	16	1.45	384.02	595320	2234200000	16895000000000	2.2705e+17
64	16	1.5	394.5	622170	2250100000	14113000000000	1.2645e+17
512	10	1	10.374	339.71	24082	3018800	577710000
512	12	1	11.955	455.48	37500	5461500	1219600000
512	14.4	1	14.959	727.15	77211	14545000	4153700000
512	17.28	1	23.024	1779.4	303160	91883000	41875000000
512	20.736	1	66.612	16870	9629200	9598900000	13792000000000
512	24.883	1	117.09	53700	56117000	101090000000	256450000000000
512	29.86	1	206.13	166630	293120000	843020000000	3332600000000000
512	35.832	1	352.38	479630	1405100000	6692500000000	43425000000000000
512	42.998	1	606.72	1453600	8023800000	75964000000000	9.7654e+17
512	51.598	1	1052.3	4589800	51443000000	1153800000000000	3.872e+19
512	61.917	1	1854.8	13556000	208350000000	4884200000000000	1.4572e+20
512	74.301	1	3106.1	36884000	862090000000	29085000000000000	1.2066e+21
512	89.161	1	5808.7	141290000	7937600000000	7.4464e+17	9.3188e+22
512	106.99	1	8997.8	301770000	19916000000000	1.966e+18	2.4929e+23
512	128.39	1	14114	709190000	66168000000000	8.6684e+18	1.3789e+24
512	154.07	1	28679	3078400000	630290000000000	1.7585e+20	5.7009e+25
512	184.88	1	48613	7465600000	2052100000000000	8.0184e+20	3.9124e+26
512	221.86	1	102080	37683000000	26594000000000000	2.4824e+22	2.6129e+28
512	266.23	1	148670	69084000000	55524000000000000	5.9884e+22	7.7e+28
512	319.48	1	389440	564180000000	1.3589e+18	4.0469e+24	1.3459e+31
512	32	0.05	4.0269	33.676	475.41	10392	337330
512	32	0.1	4.1	35.321	514.08	11423	365840
512	32	0.15	4.2806	39.74	637.73	15818	561610
512	32	0.2	4.3361	40.826	660.05	16346	576300
512	32	0.25	4.2274	38.038	579.66	13407	439400
512	32	0.3	4.2731	39.132	610.05	14433	479640
512	32	0.35	4.5324	45.424	792.53	21332	814500
512	32	0.4	4.7142	50.229	950.16	28254	1213500
512	32	0.45	5.0898	60.837	1328.3	46641	2407900
512	32	0.5	5.7842	83.3	2264.9	100820	6638700
512	32	0.55	6.303	101.76	3176.7	166650	13280000
512	32	0.6	8.0898	173.6	7313.1	516750	54694000
512	32	0.65	112.46	48008	43460000	65109000000	137500000000000
512	32	0.7	137.35	72540	85003000	180270000000	605630000000000
512	32	0.75	159.23	96883	126340000	273080000000	820370000000000
512	32	0.8	177.39	120870	181030000	471890000000	1821900000000000
512	32	0.85	199.68	156130	268310000	766000000000	3015200000000000
512	32	0.9	217.02	186470	383770000	1534100000000	9538200000000000
512	32	0.95	234.91	215840	439220000	1501000000000	7124500000000000
512	32	1	252.12	251120	559420000	2102300000000	10957000000000000
512	32	1.05	264.57	268980	583780000	2027400000000	9452100000000000
512	32	1.1	280.49	300360	693870000	2658800000000	14147000000000000
512	32	1.15	298.97	365550	1104200000	6297500000000	52988000000000000
512	32	1.2	314.42	391690	1098800000	5263000000000	35627000000000000
512	32	1.25	324.31	407330	1098500000	4769200000000	28121000000000000
512	32	1.3	341.9	458570	1336200000	6250400000000	39354000000000000
512	32	1.35	357.29	506510	1609800000	8635200000000	64479000000000000
512	32	1.4	364.89	516200	1586600000	8059000000000	57366000000000000
512	32	1.45	379.6	580990	2111500000	14115000000000	1.4225e+17
512	32	1.5	392.88	639980	2800500000	28516000000000	5.0611e+17
